# Supplementary material
Source: PubMed Central journal article supplement (PMC7688219)
Supplement: AEM.02007-20-s0001.pdf [file AEM.02007-20-s0001.pdf]

741 **Supplementary Figures**  
 742

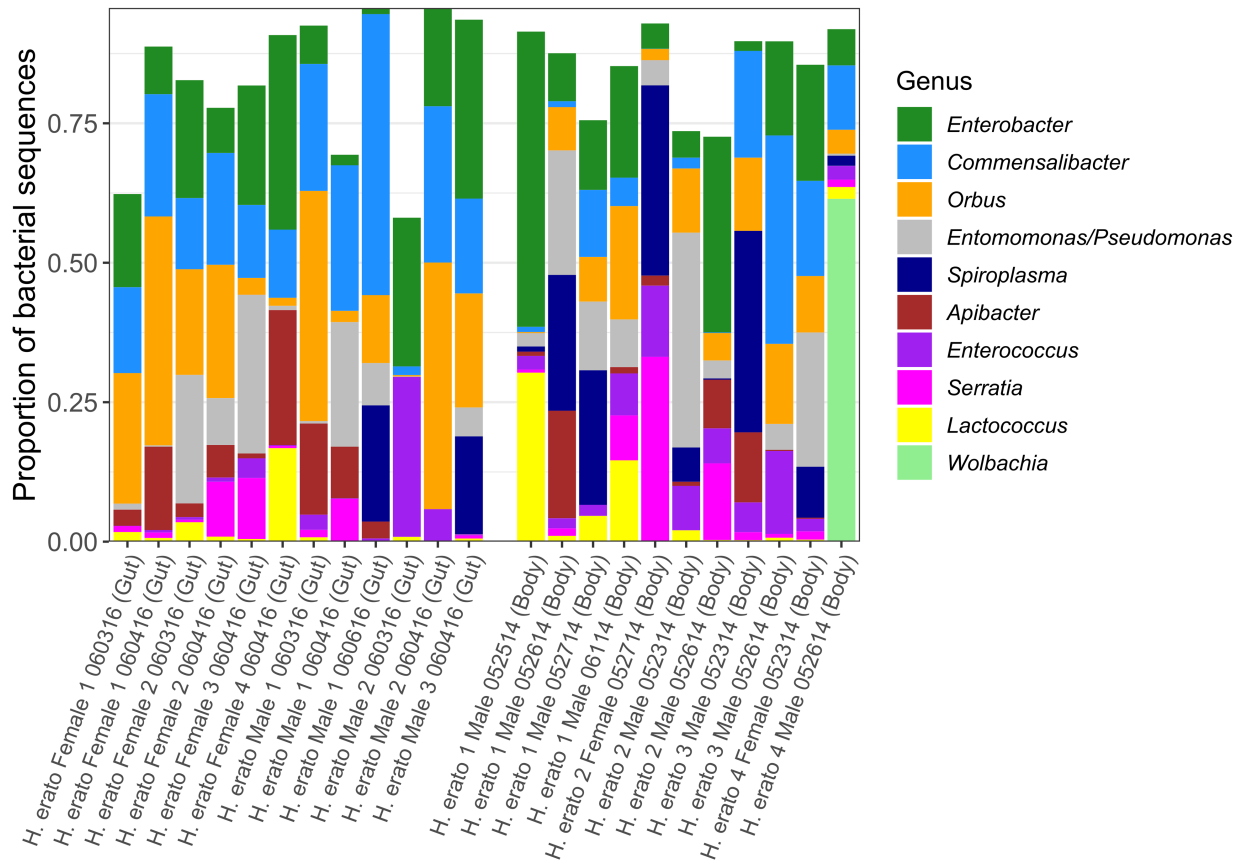

743  
 744  
 745  
 746  
 747  
 748  
 749  
 750  
 751  
 752  
 753

Figure S1. Whole-body bacterial communities are consistent among individuals and predominantly represent gut-associated taxa. Shown are the relative abundances of the top 10 bacterial genera (ranked by mean abundance) across *H. erato demophoon* collected from Gamboa, Panama. Remaining white space represents sequences belonging to other genera; these made up a median 16% of sequence libraries across individuals. Samples on the left are isolated guts from individuals collected in 2016, while samples on the right are whole-body homogenates from individuals collected in 2014. Note that *Enterobacter* here includes sequences originally assigned as *Klebsiella* and some other closely related Enterobacteriaceae genera (see Methods).

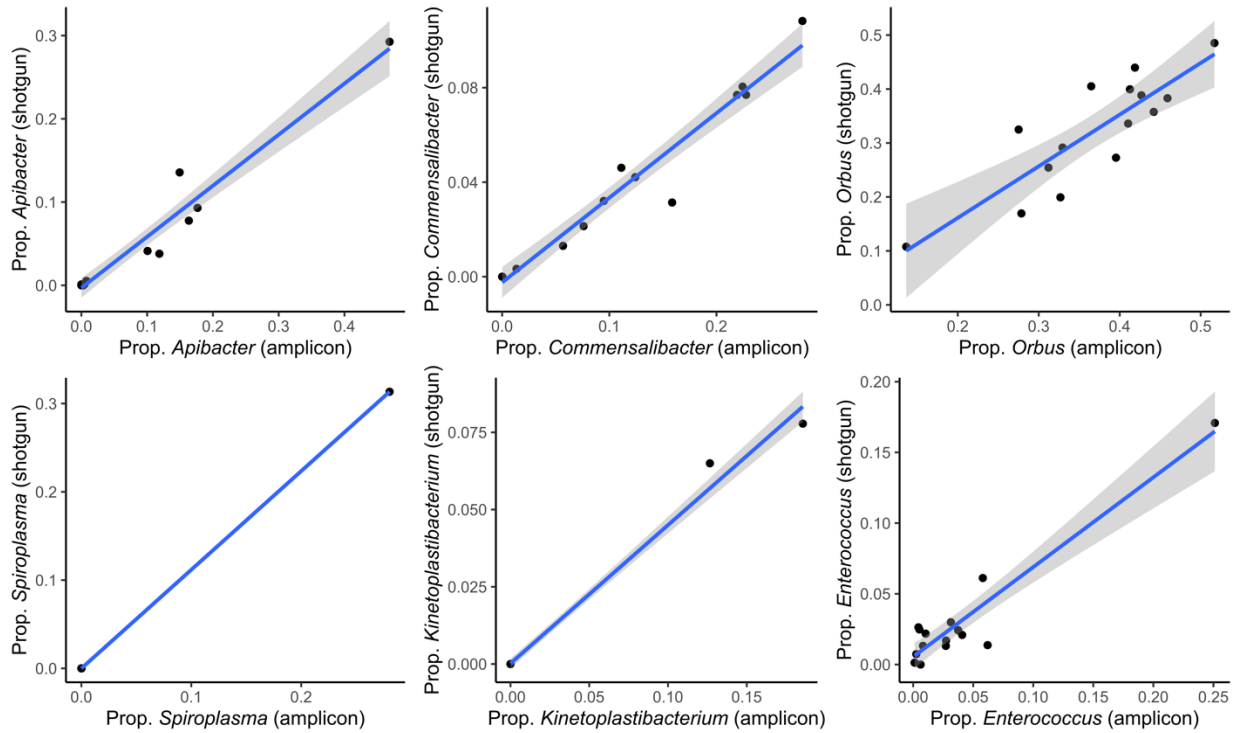

754  
 755  
 756  
 757  
 758  
 759

Figure S2. Bacterial genus-level relative abundances are highly correlated between the amplicon sequence libraries and metagenomes. Shown are relative abundances of six of the most abundant genera across the 15 butterfly gut samples for which we obtained both amplicon and shotgun metagenomic sequence data.

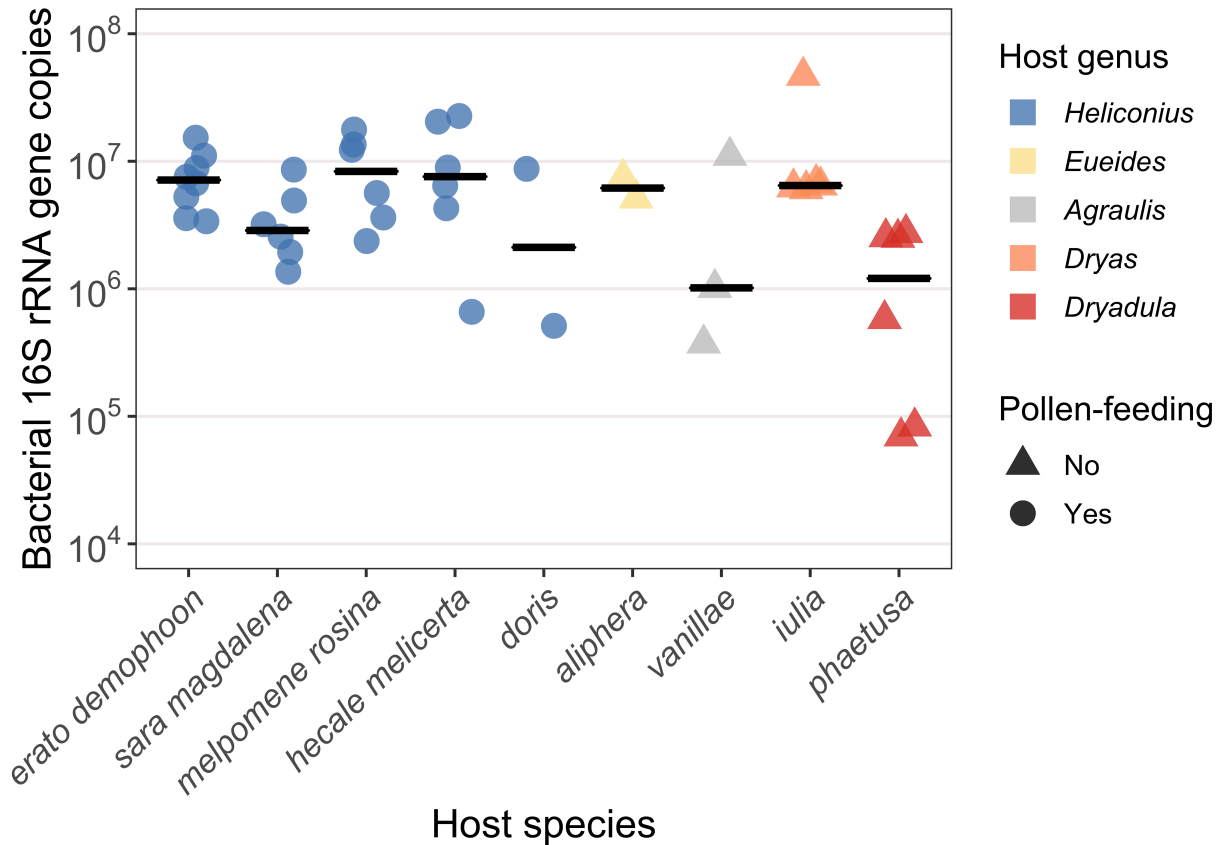

760  
 761  
 762  
 763  
 764  
 765  
 766  
 767

Figure S3. Absolute abundances of bacteria in the head and thorax of adult heliconiine butterflies, derived from qPCR. Shown are the number of bacterial 16S rRNA gene copies per subsample (approx. 50 mg) of homogenized, combined head and thorax tissue. These individuals were collected from Gamboa, Panama in 2016 (N = 28 *Heliconius*, 16 other Heliconiini).

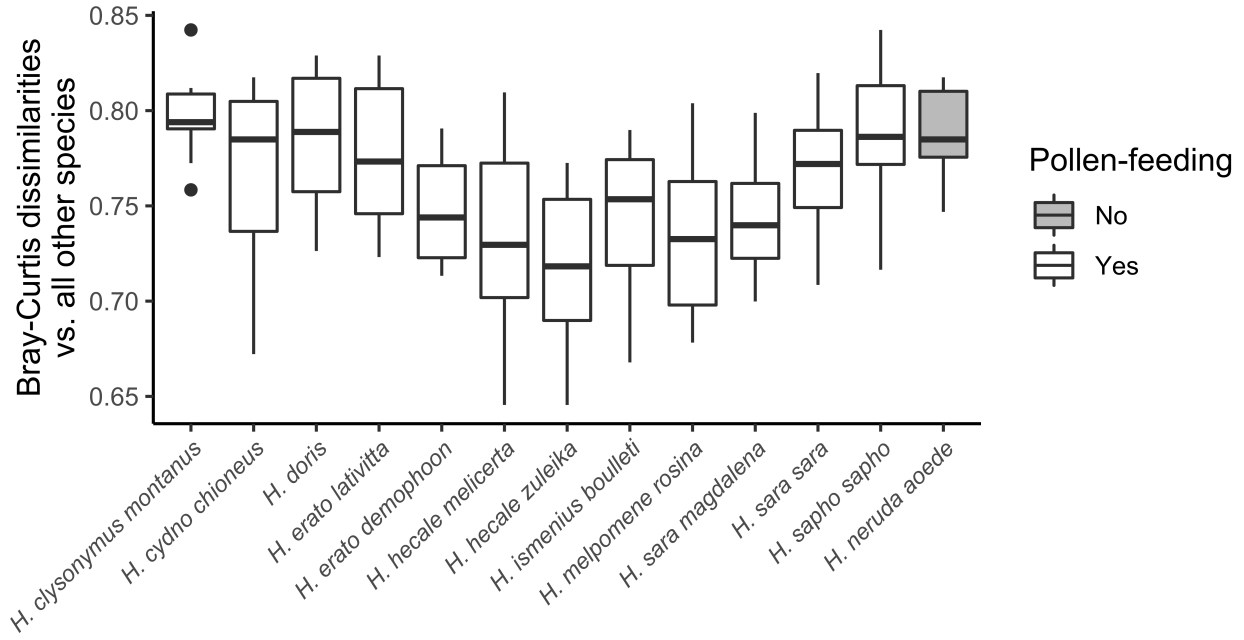

768  
 769  
 770  
 771  
 772  
 773  
 774

Figure S4. The non-pollen-feeding species *Heliconius aoede* is not uniquely distinct from pollen-feeding *Heliconius* species. Whole-body microbiomes from each focal species (x axis) are compared to all other species using Bray-Curtis dissimilarities. For a given comparison of two species' microbiomes, intraspecific replication was handled by averaging dissimilarities among all pairs of individuals.

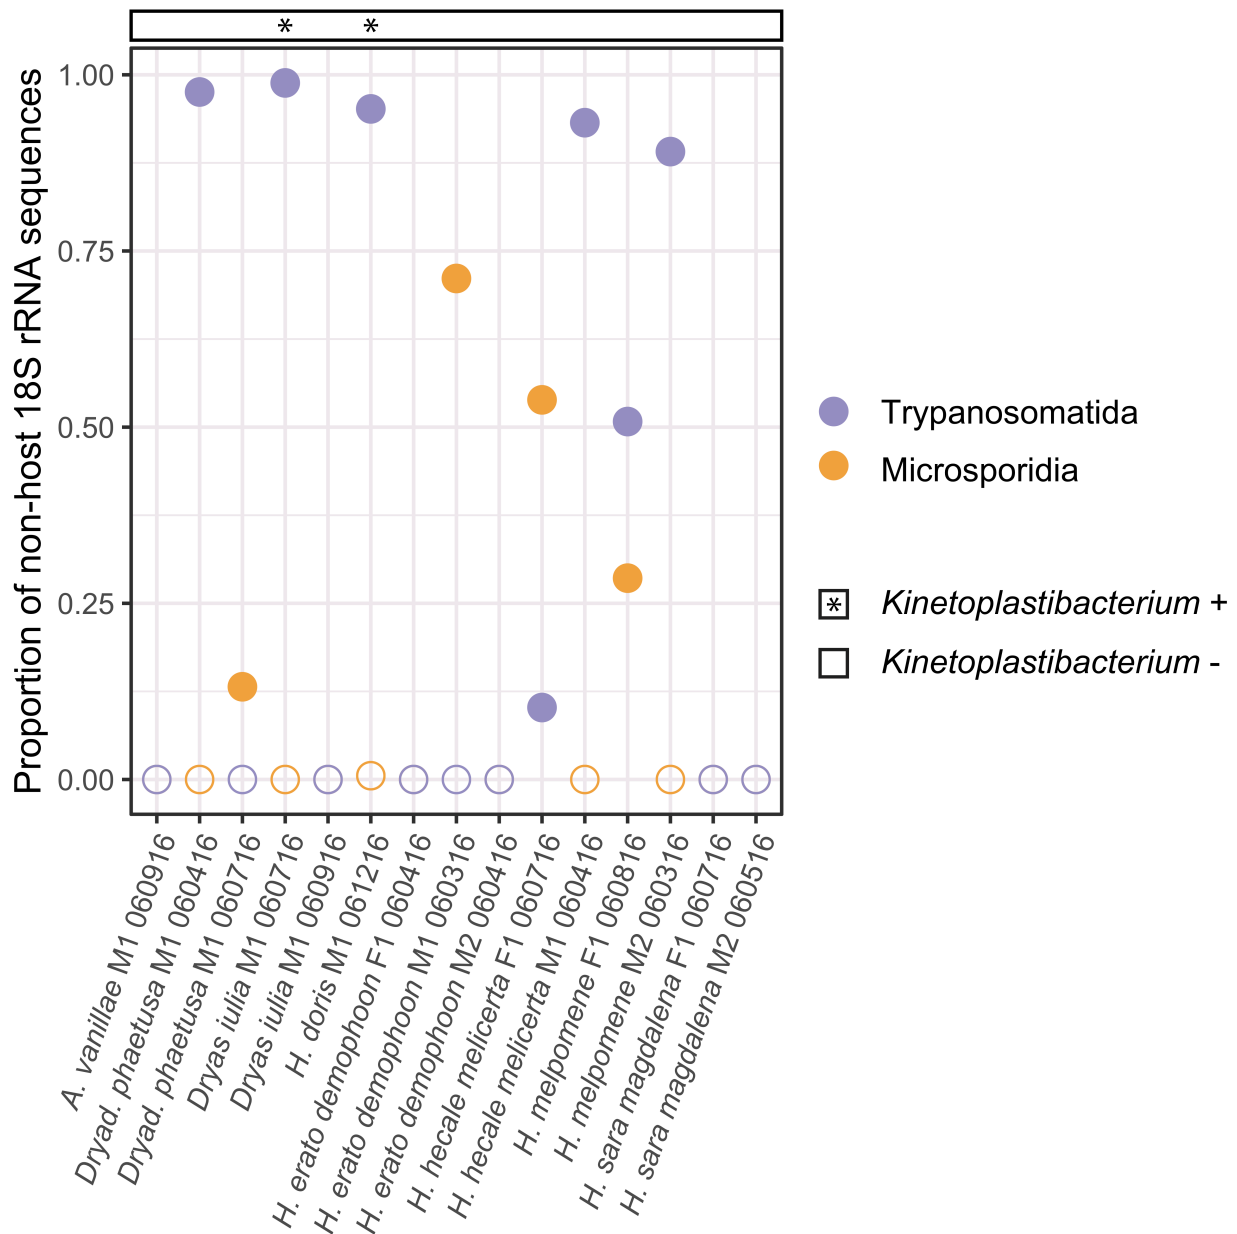

775  
776  
777  
778  
779  
780  
781  
782  
783

Figure S5. Microsporidia and Trypanosomatidae (related to *Crithidia*, *Leishmania*, and *Trypanosoma*) are prevalent in the 15 butterfly individuals with sequenced gut metagenomes. Points show the proportion of each microeukaryotic taxon out of all non-host 18S rRNA sequences identified by phyloFlash. Circles are filled if the proportion of microsporidia or trypanosomatids exceeded 0.01. Asterisks indicate samples in which *Kinetoplastibacterium*, a bacterial endosymbiont of trypanosomatids, was detected in metagenomes. Other microeukaryotes not shown here comprise a variety of very low-abundance taxa (i.e.  $\leq 30$  total reads per metagenome) classified mainly as coccidia, ascomycete fungi, acanthamoeba, and algae.

784 **Supplementary Table**  
785

| Host taxon        | Phylum            | Class               | Order                 | Family           | Genus                   | Mean prop. gut<br>+/- SEM      | Mean prop. head/thorax<br>+/- SEM | p value           |                    |
|-------------------|-------------------|---------------------|-----------------------|------------------|-------------------------|--------------------------------|-----------------------------------|-------------------|--------------------|
| <i>Heliconius</i> | Bacteroidetes     | Bacteroidia         | Flavobacteriales      | Weeksellaceae    | <i>Apibacter</i>        | 0.036 +/- 0.009                | 0.002 +/- 0.001                   | < 0.001           |                    |
|                   |                   |                     |                       |                  | <i>Chishuiella</i>      | 0.007 +/- 0.003                | 0.095 +/- 0.027                   | 0.001             |                    |
|                   |                   |                     |                       |                  | <i>Chryseobacterium</i> | 0.011 +/- 0.004                | 0.096 +/- 0.024                   | 0.001             |                    |
|                   | Firmicutes        | Bacilli             | Lactobacillales       | Enterococcaceae  | <i>Enterococcus</i>     | 0.031 +/- 0.008                | 0.021 +/- 0.006                   | 0.117             |                    |
|                   |                   |                     |                       |                  | Streptococcaceae        | <i>Lactococcus</i>             | 0.02 +/- 0.006                    | 0.033 +/- 0.009   | 0.793              |
|                   | Proteobacteria    | Alphaproteobacteria | Acetobacterales       | Acetobacteraceae | <i>Asaia</i>            | 0.024 +/- 0.007                | 0.004 +/- 0.002                   | 0.001             |                    |
|                   |                   |                     |                       |                  | <i>Commensalibacter</i> | 0.12 +/- 0.02                  | 0.007 +/- 0.003                   | < 0.001           |                    |
|                   |                   |                     |                       |                  | <i>Swaminathania</i>    | 0.013 +/- 0.01                 | 0.016 +/- 0.014                   | 0.745             |                    |
|                   |                   |                     |                       |                  | <i>Variovorax</i>       | 0.01 +/- 0.004                 | 0.021 +/- 0.006                   | 0.017             |                    |
|                   |                   |                     |                       |                  | Enterobacteriales       | Enterobacteriaceae             | <i>Enterobacter</i>               | 0.233 +/- 0.034   | 0.031 +/- 0.007    |
|                   |                   | Gammaproteobacteria | Betaproteobacteriales | Burkholderiaceae | <i>Serratia</i>         | 0.037 +/- 0.01                 | 0.027 +/- 0.017                   | 0.013             |                    |
|                   |                   |                     |                       |                  | Orbales                 | Orbaceae                       | <i>Orbus</i>                      | 0.163 +/- 0.024   | 0.021 +/- 0.01     |
|                   |                   |                     | Pseudomonadales       | Moraxellaceae    | <i>Acinetobacter</i>    | 0.023 +/- 0.007                | 0.293 +/- 0.041                   | < 0.001           |                    |
|                   |                   |                     |                       |                  | Pseudomonadaceae        | <i>Entomomonas/Pseudomonas</i> | 0.086 +/- 0.017                   | 0.024 +/- 0.01    | 0.291              |
|                   |                   |                     |                       |                  | Tenericutes             | Mollicutes                     | Entomoplasmatales                 | Spiroplasmataceae | <i>Spiroplasma</i> |
|                   | Other Heliconiini | Bacteroidetes       | Bacteroidia           | Flavobacteriales | Weeksellaceae           | <i>Apibacter</i>               | 0.139 +/- 0.045                   | 0.008 +/- 0.004   | 0.083              |
|                   |                   |                     |                       |                  |                         | <i>Chishuiella</i>             | 0.009 +/- 0.003                   | 0.138 +/- 0.029   | 0.016              |
|                   |                   |                     |                       |                  |                         | <i>Chryseobacterium</i>        | 0 +/- 0                           | 0.015 +/- 0.012   | 0.808              |
|                   |                   | Firmicutes          | Bacilli               | Lactobacillales  | Enterococcaceae         | <i>Enterococcus</i>            | 0.056 +/- 0.027                   | 0.031 +/- 0.011   | 0.843              |
|                   |                   |                     |                       |                  |                         | Streptococcaceae               | <i>Lactococcus</i>                | 0.036 +/- 0.026   | 0.012 +/- 0.011    |
| Proteobacteria    |                   | Alphaproteobacteria | Acetobacterales       | Acetobacteraceae | <i>Asaia</i>            | 0.153 +/- 0.039                | 0.004 +/- 0.001                   | 0.01              |                    |
|                   |                   |                     |                       |                  | <i>Commensalibacter</i> | 0.031 +/- 0.015                | 0.002 +/- 0.002                   | 0.106             |                    |
|                   |                   |                     |                       |                  | <i>Swaminathania</i>    | 0.007 +/- 0.004                | 0 +/- 0                           | 0.226             |                    |
|                   |                   |                     |                       |                  | <i>Variovorax</i>       | 0.005 +/- 0.002                | 0.016 +/- 0.004                   | 0.292             |                    |
|                   |                   |                     |                       |                  | Enterobacteriales       | Enterobacteriaceae             | <i>Enterobacter</i>               | 0.156 +/- 0.042   | 0.014 +/- 0.006    |
|                   |                   | Gammaproteobacteria | Betaproteobacteriales | Burkholderiaceae | <i>Serratia</i>         | 0.02 +/- 0.012                 | 0.001 +/- 0                       | 0.075             |                    |
|                   |                   |                     |                       |                  | Orbales                 | Orbaceae                       | <i>Orbus</i>                      | 0.139 +/- 0.043   | 0.007 +/- 0.004    |
|                   |                   |                     | Pseudomonadales       | Moraxellaceae    | <i>Acinetobacter</i>    | 0.046 +/- 0.018                | 0.45 +/- 0.054                    | < 0.001           |                    |
|                   |                   |                     |                       |                  | Pseudomonadaceae        | <i>Entomomonas/Pseudomonas</i> | 0.02 +/- 0.017                    | 0.011 +/- 0.004   | 0.393              |
|                   |                   |                     |                       |                  | Tenericutes             | Mollicutes                     | Entomoplasmatales                 | Spiroplasmataceae | <i>Spiroplasma</i> |

786  
787  
788 Table S1. Relative abundances and within-body distribution of the top 15 bacterial genera (ranked by mean  
789 abundance) across butterflies collected from Gamboa, Panama in 2016. These individuals were dissected  
790 to compare microbiomes between isolated gut tissue and the combined head and thorax. Abundances are  
791 shown for *Heliconius* (top) and species belonging to other heliconiine genera (bottom) separately. P values  
792 are from a nonparametric statistical test of proportions in guts versus head/thorax samples, after FDR  
793 correction (see Methods).
